# Supplementary material for: Building a Bird: Musculoskeletal Modeling and Simulation of Wing-Assisted Incline Running During Avian Ontogeny
Source: PubMed Central journal article supplement (PMC6205952; doi:10.3389/fbioe.2018.00140), 2018-10-23

**Figure S3. Timing of aerodynamic force production.** The timing of aerodynamic force production used in simulations (A) is consistent with the timing of force production measured *in vivo* (i.e., peaks in mid-downstroke) (B). (A): aerodynamic force produced by the manual (“hand”) segment of the adult chukar wing, during the downstroke; (B) modified from (Lentink et al., 2015), shaded areas represent downstrokes.

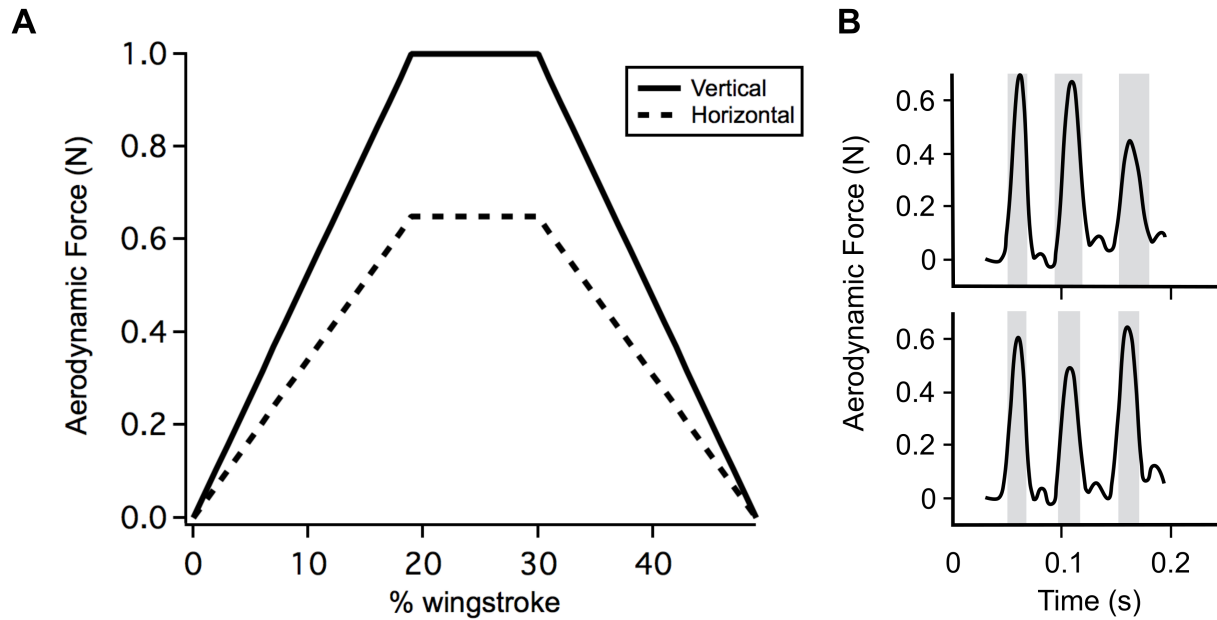

Supplement: Image_3.pdf [file Image_3.pdf]
