# Supplementary material for: Building a Bird: Musculoskeletal Modeling and Simulation of Wing-Assisted Incline Running During Avian Ontogeny
Source: PubMed Central journal article supplement (PMC6205952; doi:10.3389/fbioe.2018.00140), 2018-10-23
Supplement: Table_4.pdf [file Table_4.pdf]

**Table S4. Reserve actuators.** Reserve actuators, which contribute torque if muscles are not strong enough, were set at an optimal torque representing 50% of the maximum torque (based on inverse dynamics) at a joint in a given direction, for each model. Maximum joint torques, and hence the magnitudes of reserve actuators, increase from baby to juvenile to adult. Long-axis rotation torques are small compared to other motions, and, at the elbow and wrist, abduction-adduction torques are generally greater than those for flexion-extension, reflecting the high inertial torques associating with flapping and aerodynamic force production. Similarly, at the shoulder, elevation-depression torques are greatest in the adult and juvenile, but protraction-retraction is greatest in the baby; young chicks tend to flap in a more craniocaudal direction than older birds (Heers et al., 2011).

|                                                                         | Shoulder moments (N m) |          |        | Elbow moments (N m) |          |        | Wrist moments (N m) |          |         |
|-------------------------------------------------------------------------|------------------------|----------|--------|---------------------|----------|--------|---------------------|----------|---------|
|                                                                         | Baby                   | Juvenile | Adult  | Baby                | Juvenile | Adult  | Baby                | Juvenile | Adult   |
| elevation-depression (shoulder) or extension-flexion (elbow, wrist)     | 0.000955               | 0.0199   | 0.193  | 0.000456            | 0.00958  | 0.0606 | 0.000106            | 0.00201  | 0.0198  |
| protraction-retraction (shoulder) or abduction-adduction (elbow, wrist) | 0.00104                | 0.00901  | 0.161  | 0.000865            | 0.00730  | 0.104  | 0.000298            | 0.00496  | 0.0337  |
| pronation-supination                                                    | 0.000933               | 0.00787  | 0.0994 | 0.000296            | 0.00536  | 0.0427 | 0.0000331           | 0.000339 | 0.00497 |
