# Supplementary material for: Building a Bird: Musculoskeletal Modeling and Simulation of Wing-Assisted Incline Running During Avian Ontogeny
Source: PubMed Central journal article supplement (PMC6205952; doi:10.3389/fbioe.2018.00140), 2018-10-23
Supplement: Table_8.pdf [file Table_8.pdf]

**Table S8 (parts A, B, C). Muscle functions based on muscle moment arms and co-occurrence of activation and kinematics.**

Behaviors: WAIR = wing-assisted incline running, AF = ascending flight. Kinematics: DEP = depression, ELEV = elevation, RET = retraction, PROT = protraction, PRO = pronation, SUP = supination, FLEX = flexion, EXT = extension, ADD = adduction, ABD = abduction; DS = downstroke, US = upstroke. Superscripts: A = adult model (>100 days), J = juvenile model (18-20 days), B = baby model (7-8 days); if no superscript, kinematic rotation occurs in all models. Text color, potential function column: black = consistent w/ previously suggested function, red = inconsistent w/ previously suggested function, blue = no previously suggested function; bold = main function. Cell color, right column: green = DS muscle or muscle not active during DS-US transition, blue = US muscle, active during DS-US transition. \*\*: biarticular muscle. \*: not tested here (digit kinematics).

A

| Muscle                      | EMG timing (colored lines = WAIR simulations, Adult, Juvenile, or Baby model; gray bars = AF, from Dial 1992) | Moment arms (Adult solid lines, Juvenile large dash, Baby small dash) + timing of activity (WAIR, simulated; AF from Dial 1991 & 1992) + kinematics (from Heers et al. 2016) |    | Potential function based on moment arms and phys x-sectional area (Table 2) (black: consistent with previous data, blue: no previous data, red: inconsistent with previous data) |                                  | Relative importance (average % torque from Table 2) |                    | Reason for discrepancy with previous work (Dial 1992, Poore 1997, Biewener 2011, Berg & Biewener 2012) on flight?                           | Suggested function based on moment arms and co-occurrence of EMG and kinematics; green = downstroke muscle, blue = upstroke muscle |                                                                                                                                                      |
|-----------------------------|---------------------------------------------------------------------------------------------------------------|------------------------------------------------------------------------------------------------------------------------------------------------------------------------------|----|----------------------------------------------------------------------------------------------------------------------------------------------------------------------------------|----------------------------------|-----------------------------------------------------|--------------------|---------------------------------------------------------------------------------------------------------------------------------------------|------------------------------------------------------------------------------------------------------------------------------------|------------------------------------------------------------------------------------------------------------------------------------------------------|
|                             |                                                                                                               | WAIR                                                                                                                                                                         | AF | WAIR                                                                                                                                                                             | AF (adult only)                  | WAIR                                                | AF (adult only)    |                                                                                                                                             |                                                                                                                                    |                                                                                                                                                      |
| Pectoralis                  |                                                                                                               |                                                                                                                                                                              |    | DEP<br>RET or PROT<br>PRO                                                                                                                                                        | same                             | 97-100<br>52-59, 19-24<br>73-79                     | 96<br>51, 13<br>76 | Consistent                                                                                                                                  | decelerate ELEV -> DEP;<br>PROT -> RET;<br>decelerate SUP -> PRO                                                                   |                                                                                                                                                      |
| Supracoracoideus            |                                                                                                               |                                                                                                                                                                              |    | ELEV<br>PROT<br>SUP                                                                                                                                                              | same                             | 54-75<br>67-74<br>84-91                             | 50<br>80<br>72     | Consistent                                                                                                                                  | decelerate DEP + RET + PRO -><br>ELEV + SUP                                                                                        |                                                                                                                                                      |
| Coracobrachialis posterior  |                                                                                                               |                                                                                                                                                                              |    | ELEV or DEP <sup>J</sup><br>RET<br>SUP or PRO                                                                                                                                    | mainly DEP<br>RET<br>SUP or PRO  | x, x<br>10-23<br>4-12, x                            | x<br>19<br>38, x   | WAIR kinematics: humerus kept elevated -> ELEV instead of DEP                                                                               |                                                                                                                                    | DEP (AF) or opposes DEP (AF, WAIR);<br>decelerate PROT -> RET;<br>PRO or opposes PRO                                                                 |
| Coracobrachialis anterior   | Very low activation                                                                                           |                                                                                                                                                                              |    | DEP or ELEV<br>PROT<br>SUP or PRO <sup>B</sup>                                                                                                                                   | same                             | x, x<br>x<br>x, x                                   | x, x<br>x<br>x     | No previously suggested functions                                                                                                           | does not seem to contribute much — mainly stabilization                                                                            |                                                                                                                                                      |
| Subcoracoideus              |                                                                                                               |                                                                                                                                                                              |    | ELEV or DEP <sup>J</sup><br>RET<br>PRO or SUP <sup>B</sup>                                                                                                                       | ELEV or DEP<br>RET<br>PRO or SUP | x, x<br>6-11<br>x, x                                | x, x<br>9<br>x, 16 | No previously suggested functions                                                                                                           | opposes DEP;<br>decelerate PROT -> RET;<br>mainly PRO                                                                              |                                                                                                                                                      |
| Latissimus dorsi            |                                                                                                               |                                                                                                                                                                              |    | ELEV<br>RET<br>PRO or SUP                                                                                                                                                        | same                             | 8-23<br>14-26<br>x, x                               | 19<br>12<br>x, x   | No previously suggested functions                                                                                                           | opposes DEP -> ELEV;<br>decelerate PROT -> RET                                                                                     |                                                                                                                                                      |
| Scapulohumeralis caudalis   |                                                                                                               |                                                                                                                                                                              |    | ELEV or DEP <sup>J</sup><br>RET or PROT<br>PRO                                                                                                                                   | same                             | 4-21, x<br>17-22, 5-30<br>17-30                     | 24<br>18, 14<br>21 | WAIR kinematics: humerus very retracted -> PROT instead of RET                                                                              |                                                                                                                                    | oppose DEP <sup>A</sup> -> ELEV <sup>A</sup> (esp. WAIR);<br>RET -> oppose RET -> PROT;<br>mainly PRO or oppose PRO                                  |
| Subscapularis               |                                                                                                               |                                                                                                                                                                              |    | ELEV<br>Mainly RET<br>PRO                                                                                                                                                        | ELEV<br>RET<br>PRO               | x<br>x<br>x                                         | x<br>x<br>x        | Disagree w/ previous work: muscle pulls "down", but elevates an already elevated humerus                                                    |                                                                                                                                    | does not seem to contribute much:<br>opposes DEP;<br>decelerate PROT -> RET;<br>decelerate SUP (AF) -> PRO                                           |
| Deltoides major             |                                                                                                               |                                                                                                                                                                              |    | ELEV<br>PROT or RET <sup>B</sup><br>SUP                                                                                                                                          | ELEV<br>PROT<br>PRO or SUP       | 4-6<br>3-5, x<br>x                                  | 7<br>x<br>x, x     | WAIR kinematics: humerus very retracted -> PROT instead of RET                                                                              |                                                                                                                                    | decelerate DEP -> ELEV;<br>opposes RET <sup>A</sup> -> PROT <sup>A</sup> (WAIR);<br>decelerate PRO -> SUP (WAIR), or opposes long axis rotation (AF) |
| Tensor propatagialis brevis |                                                                                                               |                                                                                                                                                                              |    | DEP or ELEV<br>PROT or RET <sup>B</sup><br>SUP or PRO <sup>B</sup>                                                                                                               | same                             | x, x<br>7-12, x<br>5-6, x                           | x, x<br>9<br>x     | No previously suggested functions (at shoulder); note that SIMM cannot account for the role of the propatagialis in tensing the propatagium | ELEV <sup>A</sup> (WAIR) or DEP (AF), stabilization;<br>PROT (WAIR) or opposes RET (AF)<br>SUP or opposes PRO (AF)                 |                                                                                                                                                      |
| Scapulothoracicus           |                                                                                                               |                                                                                                                                                                              |    | ELEV<br>RET<br>PRO or SUP <sup>B</sup>                                                                                                                                           | same                             | 4-7<br>5-11<br>x, x                                 | 7<br>x<br>x        | Consistent                                                                                                                                  | opposes DEP -> ELEV;<br>RET<br>~ no long axis rotation                                                                             |                                                                                                                                                      |

SHOULDER

**Table S8 (parts A, B, C). Muscle functions based on muscle moment arms and co-occurrence of activation and kinematics.**

Behaviors: WAIR = wing-assisted incline running, AF = ascending flight. Kinematics: DEP = depression, ELEV = elevation, RET = retraction, PROT = protraction, PRO = pronation, SUP = supination, FLEX = flexion, EXT = extension, ADD = adduction, ABD = abduction; DS = downstroke, US = upstroke. Superscripts: A = adult model (>100 days), J = juvenile model (18-20 days), B = baby model (7-8 days); if no superscript, kinematic rotation occurs in all models. Text color, potential function column: black = consistent w/ previously suggested function, red = inconsistent w/ previously suggested function, blue = no previously suggested function; bold = main function. Cell color, right column: green = DS muscle or muscle not active during DS-US transition, blue = US muscle, active during DS-US transition. \*\*: biarticular muscle. \*: not tested here (digit kinematics).

**B**

| Muscle                        | EMG timing (colored lines = WAIR simulations, Adult, Juvenile, or Baby model; gray bars = AF, from Dial 1992) | Moment arms (Adult solid lines, Juvenile large dash, Baby small dash) + timing of activity (WAIR, simulated; AF from Dial 1991 & 1992) + kinematics (from Heers et al. 2016) |    | Potential function based on moment arms and phys x-sectional area (Table 2) (black: consistent with previous data, blue: no previous data, red: inconsistent with previous data) |                           | Relative importance (average % torque from Table 2) |                    | Reason for discrepancy with previous work (Dial 1992, Poore 1997, Biewener 2011, Berg & Biewener 2012) on flight?                          | Suggested function based on moment arms and co-occurrence of EMG and kinematics; green = downstroke muscle, blue = upstroke muscle |
|-------------------------------|---------------------------------------------------------------------------------------------------------------|------------------------------------------------------------------------------------------------------------------------------------------------------------------------------|----|----------------------------------------------------------------------------------------------------------------------------------------------------------------------------------|---------------------------|-----------------------------------------------------|--------------------|--------------------------------------------------------------------------------------------------------------------------------------------|------------------------------------------------------------------------------------------------------------------------------------|
|                               |                                                                                                               | WAIR                                                                                                                                                                         | AF | WAIR                                                                                                                                                                             | AF (adult only)           | WAIR                                                | AF (adult only)    |                                                                                                                                            |                                                                                                                                    |
| Tensor propatagialis brevis   |                                                                                                               |                                                                                                                                                                              |    | FLEX<br>ADD <sup>B</sup> or ABD<br>PRO                                                                                                                                           | FLEX<br>ADD or ABD<br>PRO | 39-49<br>15-16, 19-24<br>47-55                      | 37<br>17, 33<br>53 | Consistent; note that SIMM cannot account for the role of the propatagialis in tensing the propatagium                                     | <b>FLEX (AF) or opposes FLEX (WAIR);</b><br><b>mainly opposes ADD and ABD (WAIR, AF);</b><br>PRO or opposes SUP                    |
| Biceps brachii                |                                                                                                               |                                                                                                                                                                              |    | FLEX<br>ADD or ABD <sup>B</sup><br>PRO or SUP <sup>A</sup>                                                                                                                       | same                      | 22-32<br>6-7, x<br>5-17, 5                          | 32<br>9<br>6, 19   | Consistent                                                                                                                                 | <b>opposes EXT, or FLEX (AF)</b><br>ADD or opposes ABD;<br>SUP (AF) or opposes PRO (AF)                                            |
| Scapulotriceps                |                                                                                                               |                                                                                                                                                                              |    | EXT<br>ADD<br>SUP or PRO <sup>B</sup>                                                                                                                                            | EXT<br>ADD<br>SUP or PRO  | 29-43<br>6-11<br>11-26, x                           | 41<br>9<br>8, 8    | Consistent                                                                                                                                 | <b>opposes FLEX, or EXT (WAIR);</b><br>ADD or opposes ABD;<br>opposes PRO -> SUP                                                   |
| Humerotriceps                 |                                                                                                               |                                                                                                                                                                              |    | EXT<br>ADD<br>PRO <sup>A</sup> or SUP                                                                                                                                            | same                      | 33-48<br>10-14<br>x, 4-21                           | 45<br>12<br>7, 6   | Consistent                                                                                                                                 | <b>EXT (AF) -&gt; opposes FLEX;</b><br>ADD or opposes ABD<br>SUP or opposes PRO (AF)                                               |
| Brachialis                    |                                                                                                               |                                                                                                                                                                              |    | FLEX or EXT <sup>B</sup><br>ADD <sup>B&gt;A</sup><br>SUP <sup>B&gt;A</sup>                                                                                                       | same                      | x, x<br>x<br>x                                      | x<br>x<br>x        | No previously suggested functions                                                                                                          | opposes EXT -> FLEX;<br>opposes PRO                                                                                                |
| Pronator sublimis, profundus  |                                                                                                               |                                                                                                                                                                              |    | FLEX or EXT <sup>AB</sup><br>ADD<br>SUP                                                                                                                                          | FLEX<br>ADD<br>SUP        | 8-18, x<br>42-58<br>3-41                            | 12<br>46<br>44     | Disagree: activated during PRO but actually stabilizes against PRO; misnomer from human anatomy. Bird position left, human position right. | <br>P. profundus: mainly EXT; P. sublimis: FLEX or opposes EXT<br><b>mainly ADD;</b><br>opposes PRO, or SUP (AF)                   |
| Entepicondylar-ularis         |                                                                                                               |                                                                                                                                                                              |    | EXT <sup>BA</sup> or FLEX <sup>BJ</sup><br>ADD<br>SUP                                                                                                                            | same                      | x, x<br>7-12<br>14-21                               | x<br>7<br>20       | No previously suggested functions                                                                                                          | EXT;<br>ADD or opposes ABD;<br>opposes PRO                                                                                         |
| Supinator                     |                                                                                                               |                                                                                                                                                                              |    | FLEX or EXT <sup>B</sup><br>ABD<br>SUP or PRO <sup>BJ</sup>                                                                                                                      | same                      | x, x<br>5-10<br>x, x                                | x<br>12<br>x       | Consistent; PRO in B and J models is only brief and occurs when the muscle is not activated                                                | FLEX<br>ABD or opposes ADD                                                                                                         |
| Anconeus                      |                                                                                                               |                                                                                                                                                                              |    | FLEX <sup>A&gt;B</sup> or EXT <sup>B</sup><br>ABD<br>PRO                                                                                                                         | same                      | x, x<br>25-32<br>22-39                              | x<br>28<br>33      | No previously suggested functions                                                                                                          | FLEX;<br>ABD or opposes ADD;<br>opposes SUP                                                                                        |
| Flexor carpi ulnaris**        |                                                                                                               |                                                                                                                                                                              |    | FLEX <sup>J</sup> or EXT<br>ADD<br>SUP                                                                                                                                           | same                      | x, 11-26<br>8-11<br>21-36                           | 13<br>7<br>18      | No previously suggested functions (at elbow)                                                                                               | EXT -> opposes FLEX;<br>ADD or opposes ABD;<br>opposes PRO, or SUP                                                                 |
| Extensor metacarpi radialis** |                                                                                                               |                                                                                                                                                                              |    | FLEX<br>ABD<br>PRO or SUP                                                                                                                                                        | same                      | 9-16<br>26-38<br>x, x                               | 11<br>27<br>x      | No previously suggested functions (at elbow)                                                                                               | FLEX or opposes EXT;<br>ABD or opposes ADD                                                                                         |
| Extensor digitorum communis** |                                                                                                               |                                                                                                                                                                              |    | FLEX or EXT <sup>B</sup><br>ABD<br>PRO                                                                                                                                           | same                      | x, x<br>5-8<br>x                                    | x<br>6<br>x        | No previously suggested functions (at elbow)                                                                                               | mainly ABD                                                                                                                         |
| Extensor carpi ulnaris**      |                                                                                                               |                                                                                                                                                                              |    | FLEX or EXT <sup>B</sup><br>ABD<br>PRO                                                                                                                                           | same                      | x, x<br>7-9<br>x                                    | x<br>10<br>x       | No previously suggested functions (at elbow)                                                                                               | ABD, or opposes ADD                                                                                                                |

**Table S8 (parts A, B, C). Muscle functions based on muscle moment arms and co-occurrence of activation and kinematics.**

Behaviors: WAIR = wing-assisted incline running, AF = ascending flight. Kinematics: DEP = depression, ELEV = elevation, RET = retraction, PROT = protraction, PRO = pronation, SUP = supination, FLEX = flexion, EXT = extension, ADD = adduction, ABD = abduction; DS = downstroke, US = upstroke. Superscripts: A = adult model (>100 days), J = juvenile model (18-20 days), B = baby model (7-8 days); if no superscript, kinematic rotation occurs in all models. Text color, potential function column: black = consistent w/ previously suggested function, red = inconsistent w/ previously suggested function, blue = no previously suggested function; bold = main function. Cell color, right column: green = DS muscle or muscle not active during DS-US transition, blue = US muscle, active during DS-US transition. \*\*: biarticular muscle. \*: not tested here (digit kinematics).

C

| Muscle | EMG timing (colored lines = WAIR simulations, Adult, Juvenile, or Baby model; gray bars = AF, from Dial 1992) | Moment arms (Adult solid lines, Juvenile large dash, Baby small dash) + timing of activity (WAIR, simulated; AF from Dial 1991 & 1992) + kinematics (from Heers et al. 2016) |    | Potential function based on moment arms and phys x-sectional area (Table 2) (black: consistent with previous data, blue: no previous data, red: inconsistent with previous data) |                                                                                  | Relative importance (average % torque from Table 2) |                                        | Reason for discrepancy with previous work (Dial 1992, Poore 1997, Biewener 2011, Berg & Biewener 2012) on flight? | Suggested function based on moment arms and co-occurrence of EMG and kinematics; green = downstroke muscle, blue = upstroke muscle                                                                                                       |                                                                                                                                       |
|--------|---------------------------------------------------------------------------------------------------------------|------------------------------------------------------------------------------------------------------------------------------------------------------------------------------|----|----------------------------------------------------------------------------------------------------------------------------------------------------------------------------------|----------------------------------------------------------------------------------|-----------------------------------------------------|----------------------------------------|-------------------------------------------------------------------------------------------------------------------|------------------------------------------------------------------------------------------------------------------------------------------------------------------------------------------------------------------------------------------|---------------------------------------------------------------------------------------------------------------------------------------|
|        |                                                                                                               | WAIR                                                                                                                                                                         | AF | WAIR                                                                                                                                                                             | AF (adult only)                                                                  | WAIR                                                | AF (adult only)                        |                                                                                                                   |                                                                                                                                                                                                                                          |                                                                                                                                       |
| WRIST  | Flexor carpi ulnaris**                                                                                        |                                                                                                                                                                              |    |                                                                                                                                                                                  | FLEX or EXT <sup>J</sup><br>ADD or ABD <sup>J</sup><br>PRO or SUP <sup>A,B</sup> | FLEX<br>ADD or ABD<br>PRO or SUP                    | 89-99, x<br>22-53, 8-87<br>46-64, 8-25 | 94<br>37, 69<br>27, 65                                                                                            | Consistent; EXT moment in J small and brief                                                                                                                                                                                              | <b>FLEX or opposes EXT;</b><br>ADD or opposes ABD;<br>PRO or opposes SUP                                                              |
|        | Flexor digitorum sublimis, profundus                                                                          |                                                                                                                                                                              |    |                                                                                                                                                                                  | EXT <sup>B,J</sup> or FLEX <sup>A</sup><br>ADD<br>PRO or SUP <sup>B</sup>        | EXT or FLEX<br>ADD<br>PRO                           | 11-15, x<br>38-64<br>17-83, 29         | x<br>52<br>35                                                                                                     | No previously suggested functions (at wrist); main function may be to ADD phalanges (FLEX in human anatomy)                                                                                                                              | EXT <sup>B,J</sup> , opposes FLEX, FLEX <sup>A</sup> , opposes EXT <sup>A</sup> ;<br><b>mainly opposes ABD;</b><br>PRO or opposes SUP |
|        | Ulnometacarpalis ventralis                                                                                    | EMG very low                                                                                                                                                                 |    |                                                                                                                                                                                  | FLEX or EXT<br>ADD or ABD <sup>B</sup><br>PRO or SUP <sup>A,B</sup>              | same                                                | 4-60, x<br>4-6, x<br>8-32, 13-20       | 6, x<br>x<br>17, 80                                                                                               | No previously suggested functions                                                                                                                                                                                                        | does not seem to contribute much during WAIR:<br>FLEX;<br>ADD                                                                         |
|        | Extensor metacarpi radialis**                                                                                 |                                                                                                                                                                              |    |                                                                                                                                                                                  | EXT<br>ADD or ABD <sup>A,B</sup><br>PRO <sup>J</sup> or SUP                      | EXT<br>ADD or ABD<br>PRO or SUP                     | 59-67<br>11-36, 21-24<br>14-31, 65-79  | 60<br>23, 12<br>50, 58                                                                                            | Consistent                                                                                                                                                                                                                               | <b>EXT, also opposes FLEX;</b><br>ABD or opposes ABD (WAIR <sup>J</sup> , AF);<br>SUP or opposes PRO                                  |
|        | Extensor digitorum communis**                                                                                 |                                                                                                                                                                              |    |                                                                                                                                                                                  | EXT<br>ADD <sup>J</sup> or ABD<br>PRO <sup>B</sup> or SUP                        | EXT<br>ADD or ABD<br>PRO or SUP                     | 3-6<br>x, 28-30<br>x, 8-10             | 5<br>x, 24<br>x, x                                                                                                | Consistent - ADD moment in J brief and does not occur when muscle is activated. Should also ABD phalanges (EXT in human anatomy)                                                                                                         | <b>mainly opposes FLEX;</b><br><b>mainly opposes ADD;</b><br>SUP or opposes PRO                                                       |
|        | Extensor carpi ulnaris**                                                                                      |                                                                                                                                                                              |    |                                                                                                                                                                                  | EXT<br>ADD <sup>J</sup> or ABD<br>PRO <sup>A,B</sup> or SUP <sup>B</sup>         | same                                                | 3-9<br>x, 33-52<br>6-14, x             | 8<br>34<br>8                                                                                                      | Some texts say EXT, some say FLEX; activated during wrist flexion but actually serves to stabilize wrist - tendons of Extensor digitorum communis and Extensor carpi ulnaris pass through retinaculum on distal ulna, preventing flexion | <b>EXT but mainly opposes FLEX</b><br><b>ABD but mainly opposes ADD;</b><br>PRO but mainly opposes SUP                                |
|        | Extensor pollicis longus                                                                                      | EMG very low                                                                                                                                                                 |    |                                                                                                                                                                                  | EXT<br>ABD <sup>A,B</sup> or ADD <sup>J,BA</sup><br>PRO <sup>J</sup> or SUP      | same                                                | 3-16<br>8, x<br>x, 6-57                | 16<br>7, 8<br>9, 32                                                                                               | No previously suggested functions (at wrist); main function may be to extend pollex*                                                                                                                                                     | does not seem to contribute much to wrist movement during WAIR:<br>EXT or opposes FLEX;<br>ABD or opposes ADD;<br>opposes PRO         |
|        | Extensor indices longus                                                                                       | EMG very low                                                                                                                                                                 |    |                                                                                                                                                                                  | EXT or FLEX <sup>B</sup><br>ADD <sup>J</sup> or ABD<br>PRO <sup>J</sup> or SUP   | same                                                | 3-7, x<br>x, 9-13<br>x, 10-38          | 6<br>23<br>7                                                                                                      | No previously suggested functions (at wrist). Should also ABD interphalangeal joints* (EXT in human anatomy)                                                                                                                             | does not seem to contribute much to wrist movement during WAIR:<br>EXT or opposes FLEX;<br>ABD or opposes ADD;<br>opposes PRO         |
